# Supplementary material for: Liver cancer risk stratification using deep learning on nationwide longitudinal health screening data: a retrospective cohort study
Source: Research Square preprint supplement (doi:10.21203/rs.3.rs-7693460/v1), 2025-10-15
Supplement: Supplementary file 1 [file bf1343dcd7c0fea0f0cfa3dc.docx]

**SUPPLEMENTARY FILE**

**Table S1.** ICD-10 codes used to define the exclusion criteria and covariate conditions

**Table S2.** Definitions and measurement methods for predictor variables

**Table S3.** Hyperparameters used for training various models at t3

**Table S4.** Exposure-specific exclusion of correlated covariates in multicollinearity-adjusted Cox models

**Table S5.** Descriptive statistics of participants in the National Health Insurance Service

**Table S6.** Sensitivity analysis of model performance across different observation windows

**Table S7.** Hazard ratios for the risk of liver cancer

**Figure S1.** Flowchart of cohort selection

**Methods S1.** Data preprocessing

**Methods S2.** Fusion model development details

**Table S1.** ICD-10 codes used to define the exclusion criteria and covariate conditions

| Category | ICD-10-CM Codes |
| --- | --- |
| Liver Cancer | C22.0 or C22.9 for men and C22.0 for women |
| Chronic Hepatitis C Virus Infection | B17.10, B17.11, B18.2, B19.20, B19.21 |
| Chronic Hepatitis B Virus Infection | B16.X, B17.0, B18.0, B18.1, B19.1X |
| Alcohol-related liver conditions | F10.X, F10.XX, F10.XXX, G62.1, 142.6, K29.2X, K70.X, K70.3X, R78.0, T51.0X1, T51.0X2, T51.0X3, T51.0X4, T51.1X1, T51.8X2, T51.8X3, T51.8X4, T51.91X, T51.92X, T51.93X, T51.94X |
| Metabolic/MASLD-Related Conditions | E11.X, E11.XX, E11.XXX, E13.X, E13.XX, E13.XXX, E66.X, E66.XX, E67.0, E67.8, E68.0, E78.5, E72.21, E75.249, E77.0, E77.1, E78.X, E78.XX, E88.81X, I10.0, I11.X, I12.X, I13.X, I15.X, K75.81, K76.0, K76.89, R63.5, R73.X, R73.XX, Z68.3X, Z68.4X, Z84.81 |
| Cryptogenic | K75.4, K83.0, K83.01, E83110 |
| Cirrhosis | E83.110 (Hereditary hemochromatosis), I85.X, I85.XX (Esophageal varices), K70.3X (Alcoholic cirrhosis of the liver), K71.7 (Toxic liver disease with fibrosis and cirrhosis of the liver), K74.3-K74.5 (biliary cirrhosis), K74.6X (Unspecified cirrhosis of the liver), K76.6 (Portal hypertension), K76.7 (Hepatorenal syndrome), K76.82 (Hepatic encephalopathy), K71.0 (Alcoholic hepatitis with ascites), K70.31 (Alcoholic cirrhosis of the liver with ascites), K71.51 (Toxic liver disease with chronic active hepatitis with ascites), R18.0 (Ascites), R18.8 (Other ascites) |

Abbreviations: ICD-10-CM, International Classification of Diseases, Tenth Revision, Clinical Modification; MASLD, metabolic dysfunction-associated steatotic liver disease

**Table S2.** Definitions and measurement methods for predictor variables

| Variable | Measurement |
| --- | --- |
| Household income | Assessed using household-level insurance contributions as a proxy for household income. Originally classified into 20 quantiles, which were aggregated into four income groups for this study. |
| Alcohol consumption | Categorized into five levels based on the number of alcoholic drinks consumed per day: nondrinking (0), light drinking (>0–≤1), light-to-moderate drinking (>1–≤2), moderate-to-heavy drinking (>2–≤4), and heavy drinking (>4). Classification was based on self-reported questionnaire responses. |
| Physical activity | Average weekly frequency of (1) vigorous exercise ≥20 min and (2) moderate exercise ≥30 min, derived from self-reported questionnaire responses. |
| Smoking status | Categorized as never, former, or current smoker, based on self-reported questionnaire responses. |
| BMI | Calculated using measured height and weight obtained during health examinations. |
| Fasting blood sample | Blood tests conducted after an overnight fast. |
| History of stroke, heart disease, hypertension, diabetes, and dyslipidemia | Obtained through self-reported questionnaires during health check-ups. |
| History of HCV, HBV, ALD, MASLD, cryptogenic liver disease, cirrhosis | Defined using ICD-10 codes according to previously validated criteria; specific codes are listed in Table S2, Supplement 1 |
| Family history of liver cancer and non-liver cancers | Self-reported family history of liver cancer and other cancers. |

Abbreviations: BMI, body mass index; HCV, hepatitis C virus; HBV, hepatitis B virus; ALD, Alcohol-related liver disease; MASLD, metabolic dysfunction-associated steatotic liver disease

**Table S3.** Optimized hyperparameters used for training various models at t3

| Model | Hyperparameters and Values |
| --- | --- |
| LR | class_weight = “balanced”, solver = “newton-cg”, penalty = “l2”, tol = 0.001, C = 0.1, max_iter = 50 |
| XGBoost | objective = “binary:logistic”, eval_metric = “logloss”, scale_pos_weight = 1, n_estimators = 200, learning_rate = 0.1, min_split_loss = 0.1, max_depth = 3, subsample = 0.5, colsample_bytree = 0.5 |
| MLP | in_dim = 45, out_dim = 1, batch_size = 1024, learning_rate = 0.001, optimizer_type = “Adam”, gamma_pos = 0.05, gamma_neg = 2.5, margin = 0.1, fc_depth = 3, fc_hidden = 64, fc_activation = 'SiLU', batch_norm = False, dropout = 0.3 |
| Fusion | stat_feat_n = 15, time_feat_n = 10, num_classes = 1, learning_rate = 0.001, batch_size = 9048, cnn_channels = 64, cnn_kernel_size = 3, cnn_dropout = 0.2, use_residual = True, cnn_batch_norm = True, cnn_activation = “SiLU”, fc_activation = “SiLU”, cnn_depth = 2, fc_static_depth = 4, fc_static_hidden = 128, fc_combined_depth = 4, fc_combined_hidden = 256, fc_dropout = 0.1, fc_batch_norm = True, optimizer_type = “Adam”, gamma_pos = 0.05, gamma_neg = 2.5, margin = 0.2 |

**Table S4.** Exposure-specific exclusion of correlated covariates in multicollinearity-adjusted Cox models

| Exposure Variable | Correlated Variable Removed from the Covariates | Retained Variable in Covariates  (If not exposed) |
| --- | --- | --- |
| Waist circumference | BMI | BMI |
| Total cholesterol | HDL cholesterol | HDL cholesterol |
| History of Diabetes | Fasting serum glucose levels | Fasting serum glucose levels |
| History Dyslipidemia | HDL cholesterol | HDL cholesterol |
| History of ALD | History of MASLD | History of MASLD |
| History of cryptogenic liver disease | History of MASLD | History of MASLD |

Abbreviations: BMI, body mass index; HDL, high-density lipoprotein; ALD, alcohol-related liver disease; MASLD, metabolic dysfunction-associated steatotic liver disease

**Table S5**. Descriptive statistics of participants in the National Health Insurance Service

| Variable | Total | Non-Liver cancer | Liver cancer | p-value |
| --- | --- | --- | --- | --- |
| Number of participants (%) | 3,962,209 | 3,949,808 (99.7) | 12,401 (0.3) |  |
| Age, years, mean (SD) | 62.1 (5.5) | 62.1 (5.5) | 63.6 (5.5) | <.001 |
| Sex, N (%) |  |  |  | <.001 |
| Men | 1,784,333 (45.0) | 1,774,978 (44.9) | 9,355 (75.4) |
| Women | 2,177,876 (55.0) | 2,174,830 (55.1) | 3,046 (24.6) |
| Household incomea, N (%) |  |  |  |  |
| 1st health examination period |  |  |  | <.001 |
| 1st (highest) | 1,146,972 (28.9) | 1,143,845 (29.0) | 3,127 (25.2) |
| 2nd | 1,226,883 (31.0) | 1,222,793 (31.0) | 4,090 (33.0) |
| 3rd | 950,992 (24.0) | 947,837 (24.0) | 3,155 (25.4) |
| 4th (lowest) | 637,362 (16.1) | 635,333 (16.1) | 2,029 (16.4) |
| 2nd health examination period |  |  |  | <.001 |
| 1st (highest) | 1,139,436 (28.8) | 1,136,310 (28.8) | 3,126 (25.2) |
| 2nd | 1,216,440 (30.7) | 1,212,329 (30.7) | 4,111 (33.2) |
| 3rd | 943,572 (23.8) | 940,425 (23.8) | 3,147 (25.4) |
| 4th (lowest) | 662,761 (16.7) | 660,744 (16.7) | 2,017 (16.3) |
| 3rd health examination period |  |  |  | <.001 |
| 1st (highest) | 1,127,906 (28.5) | 1,124,739 (28.5) | 3,167 (25.5) |
| 2nd | 1,225,479 (30.9) | 1,221,375 (30.9) | 4,104 (33.1) |
| 3rd | 940,311 (23.7) | 937,201 (23.7) | 3,110 (25.1) |
| 4th (lowest) | 668,513 (16.9) | 666,493 (16.9) | 2,020 (16.3) |
| Alcohol consumption status, N (%) |  |  |  |  |
| 1st health examination period |  |  |  | <.001 |
| Nondrinking | 2,467,176 (62.3) | 2,461,090 (62.3) | 6,086 (49.1) |
| Light drinking | 583,705 (14.7) | 582,024 (14.7) | 1,681 (13.6) |
| Light-to-Moderate drinking | 310,659 (7.8) | 309,484 (7.8) | 1,175 (9.5) |
| Moderate-to-Heavy drinking | 350,001 (8.8) | 348,291 (8.8) | 1,710 (13.8) |
| Heavy drinking | 250,668 (6.3) | 248,919 (6.3) | 1,749 (14.1) |
| 2nd examination period |  |  |  | <.001 |
| Nondrinking | 2,506,431 (63.3) | 2,500,143 (63.3) | 6,288 (50.7) |
| Light drinking | 591,109 (14.9) | 589,394 (14.9) | 1,715 (13.8) |
| Light-to-Moderate drinking | 302,533 (7.6) | 301,354 (7.6) | 1,179 (9.5) |
| Moderate-to-Heavy drinking | 333,201 (8.4) | 331,583 (8.4) | 1,618 (13.0) |
| Heavy drinking | 228,935 (5.8) | 227,334 (5.8) | 1,601 (12.9) |
| 3rd health examination period |  |  |  | <.001 |
| Nondrinking | 2,546,510 (64.3) | 2,539,995 (64.3) | 6,515 (52.5) |
| Light drinking | 586,130 (14.8) | 584,432 (14.8) | 1,698 (13.7) |
| Light-to-Moderate drinking | 295,306 (7.5) | 294,130 (7.4) | 1,176 (9.5) |
| Moderate-to-Heavy drinking | 320,004 (8.1) | 318,505 (8.1) | 1,499 (12.1) |
| Heavy drinking | 214,259 (5.4) | 212,746 (5.4) | 1,513 (12.2) |
| Smoking, N (%) |  |  |  |  |
| 1st health examination period |  |  |  | <.001 |
| Never smoker | 2,684,925 (67.8) | 2,679,343 (67.8) | 5,582 (45.0) |
| Past smoker | 661,622 (16.7) | 658,574 (16.7) | 3,048 (24.6) |
| Current smoker | 615,662 (15.5) | 611,891 (15.5) | 3,771 (30.4) |
| 2nd health examination period |  |  |  | <.001 |
| Never smoker | 2,697,144 (68.1) | 2,691,510 (68.1) | 5,634 (45.4) |
| Past smoker | 696,536 (17.6) | 693,360 (17.6) | 3,176 (25.6) |
| Current smoker | 568,529 (14.3) | 564,938 (14.3) | 3,591 (29.0) |
| 3rd health examination period |  |  |  | <.001 |
| Never smoker | 2,715,110 (68.5) | 2,709,346 (68.6) | 5,764 (46.5) |
| Past smoker | 744,699 (18.8) | 741,206 (18.8) | 3,493 (28.2) |
| Current smoker | 502,400 (12.7) | 499,256 (12.6) | 3,144 (25.4) |
| Physical activity, times per week, N (%) |  |  |  |  |
| 1st health examination period |  |  |  | .162 |
| 0 | 1,924,391 (48.6) | 1,918,271 (48.6) | 6,120 (49.4) |
| 1–2 | 880,376 (22.2) | 877,693 (22.2) | 2,683 (21.6) |
| 3–4 | 813,723 (20.5) | 811,227 (20.5) | 2,496 (20.1) |
| ≥5 | 343,719 (8.7) | 342,617 (8.7) | 1,102 (8.9) |
| 2nd health examination period |  |  |  | <.001 |
| 0 | 1,867,723 (47.1) | 1,861,572 (47.1) | 6,151 (49.6) |
| 1–2 | 866,060 (21.9) | 863,557 (21.9) | 2,503 (20.2) |
| 3–4 | 856,943 (21.6) | 854,408 (21.6) | 2,535 (20.4) |
| ≥5 | 371,483 (9.4) | 370,271 (9.4) | 1,212 (9.8) |
| 3rd health examination period |  |  |  | <.001 |
| 0 | 1,826,577 (46.1) | 1,820,495 (46.1) | 6,082 (49.0) |
| 1–2 | 848,818 (21.4) | 846,362 (21.4) | 2,456 (19.8) |
| 3–4 | 893,040 (22.5) | 890,410 (22.5) | 2,630 (21.2) |
| ≥5 | 393,774 (9.9) | 392,541 (9.9) | 1,233 (9.9) |
| BMIb, kg/m2, mean (SD) |  |  |  |  |
| 1st examination period | 24.2 (3.1) | 24.2 (3.1) | 24.6 (3.2) | <.001 |
| 2nd examination period | 24.1 (2.9) | 24.1 (2.9) | 24.6 (3.2) | <.001 |
| 3rd examination period | 24.2 (3.0) | 24.2 (3.0) | 24.6 (3.2) | <.001 |
| Hemoglobin, g/dL, mean (SD) |  |  |  |  |
| 1st examination period | 13.8 (1.4) | 13.8 (1.4) | 14.3 (1.5) | <.001 |
| 2nd examination period | 13.8 (1.4) | 13.8 (1.4) | 14.3 (1.5) | <.001 |
| 3rd examination period | 13.9 (1.4) | 13.9 (1.4) | 14.3 (1.5) | <.001 |
| Fasting serum glucose, mg/dL, mean (SD) |  |  |  |  |
| 1st examination period | 100.5 (24.2) | 100.4 (24.2) | 108.2 (33.4) | <.001 |
| 2nd examination period | 101.3 (24.0) | 101.3 (24.0) | 109.9 (33.4) | <.001 |
| 3rd examination period | 102.9 (24.8) | 102.9 (24.8) | 112.1 (34.1) | <.001 |
| Total cholesterol, mg/dL mean (SD) |  |  |  |  |
| 1st examination period | 201.9 (39.5) | 202.0 (39.5) | 182.8 (40.1) | <.001 |
| 2nd examination period | 200.5 (38.8) | 200.6 (38.8) | 179.6 (39.8) | <.001 |
| 3rd examination period | 198.0 (40.2) | 198.1 (40.2) | 175.3 (36.7) | <.001 |
| HDL-cholesterol, mg/dL, mean (SD) |  |  |  |  |
| 1st examination period | 55.5 (27.6) | 55.5 (27.6) | 53.5 (24.4) | <.001 |
| 2nd examination period | 54.8 (19.4) | 54.8 (19.4) | 52.6 (15.2) | <.001 |
| 3rd examination period | 54.7 (18.8) | 54.7 (18.8) | 52.2 (15.2) | <.001 |
| Waist Circumference, cm, mean (SD) |  |  |  |  |
| 1st examination period | 81.4 (8.4) | 81.4 (8.4) | 84.8 (8.6) | <.001 |
| 2nd examination period | 81.5 (8.4) | 81.5 (8.4) | 84.8 (8.6) | <.001 |
| 3rd examination period | 81.9 (8.5) | 81.9 (8.5) | 85.2 (8.7) | <.001 |
| History of stroke, N (%) |  |  |  | .009 |
| No | 3,868,735 (97.6) | 3,856,671 (97.6) | 12,064 (97.3) |
| Yes | 93,474 (2.4) | 93,137 (2.4) | 337 (2.7) |
| History of heart disease N (%) |  |  |  | .018 |
| No | 3,742,364 (94.5) | 3,730,712 (94.5) | 11,652 (94.0) |
| Yes | 219,845 (5.5) | 219,096 (5.5) | 749 (6.0) |
| History of hypertension, N (%) |  |  |  | <.001 |
| No | 2,513,371 (63.4) | 2,506,601 (63.5) | 6,770 (54.6) |
| Yes | 1,448,838 (36.6) | 1,443,207 (36.5) | 5,631 (45.4) |
| History of diabetes, N (%) |  |  |  | <.001 |
| No | 3,428,104 (86.5) | 3,418,949 (86.6) | 9,155 (73.8) |
| Yes | 534,105 (13.5) | 530,859 (13.4) | 3,246 (26.2) |
| History of dyslipidemia, N (%) |  |  |  | <.001 |
| No | 3,345,330 (84.4) | 3,334,148 (84.4) | 11,182 (90.2) |
| Yes | 616,879 (15.6) | 615,660 (15.6) | 1,219 (9.8) |
| History of HCV, N (%) |  |  |  | <.001 |
| No | 3,955,229 (99.8) | 3,943,050 (99.8) | 12,179 (98.2) |
| Yes | 6,980 (0.2) | 6,758 (0.2) | 222 (1.8) |
| History of HBV, N (%) |  |  |  | <.001 |
| No | 3,932,194 (99.2) | 3,920,896 (99.3) | 11,298 (91.1) |
| Yes | 30,015 (0.8) | 28,912 (0.7) | 1103 (8.9) |
| History of ALD, N (%) |  |  |  | <.001 |
| No | 3,945,962 (99.6) | 3,933,910 (99.6) | 12,052 (97.2) |
| Yes | 16,247 (0.4) | 15,898 (0.4) | 349 (2.8) |
| History of MASLD, N (%) |  |  |  | <.001 |
| No | 3,585,948 (90.5) | 3,575,085 (90.5) | 10,863 (87.6) |
| Yes | 376,261 (9.5) | 374,723 (9.5) | 1,538 (12.4) |
| History of cryptogenic liver disease, N (%) |  |  |  | <.001 |
| No | 3,961,156 (100.0) | 3,948,778 (100.0) | 12,378 (99.8) |
| Yes | 1,053 (0.0) | 1,030 (0.0) | 23 (0.2) |
| History of cirrhosis, N (%) |  |  |  | <.001 |
| No | 3,960,807 (100.0) | 3,948,552 (100.0) | 12,255 (98.8) |
| Yes | 1,402 (0.0) | 1,256 (0.0) | 146 (1.2) |
| Family history of liver cancer, N (%) |  |  |  | <.001 |
| No | 3,872,313 (97.7) | 3,860,604 (97.7) | 11,709 (94.4) |
| Yes | 89,896 (2.3) | 89,204 (2.3) | 692 (5.6) |
| Family history of non-liver cancers, N (%) |  |  |  | .002 |
| No | 3,472,355 (87.6) | 3,461,374 (87.6) | 10,981 (88.5) |
| Yes | 489,854 (12.4) | 488,434 (12.4) | 1,420 (11.5) |

Abbreviations: SD, standard deviation; BMI, body mass index; HDL, high-density lipoprotein; HCV, hepatitis C virus; HBV, hepatitis B virus; ALD, alcohol-related liver disease; MASLD, metabolic dysfunction–associated steatotic liver disease.

SI conversion factors: To convert fasting serum glucose to millimoles per liter, multiply by 0.0555; HDL cholesterol to millimoles per liter, multiply by 0.0259; TC to millimoles per liter, multiply by 0.0259; hemoglobin to grams per liter, multiply by 10.

aProxy for socioeconomic status based on the National Health Insurance Service premium.

bBMI is calculated as weight in kilograms divided by height in meters squar

**Table S6.** Sensitivity analysis of model performance across different observation windows

| Model type | Optimal cutoff | AUROC (95% CI) | AUPRC (95% CI) | Sensitivity (95% CI) | Specificity (95% CI) |
| --- | --- | --- | --- | --- | --- |
| Level 1 (t3) | | | | | |
| LR | 0.507 | 0.765 (0.755–0.775) | 0.017 (0.015–0.019) | 0.701 (0.683–0.72) | 0.695 (0.694–0.696) |
| XGBoost | 0.004 | 0.768 (0.759–0.777) | 0.019 (0.017–0.021) | 0.662 (0.644–0.68) | 0.744 (0.743–0.745) |
| MLP | 0.296 | 0.796 (0.787–0.804) | 0.025 (0.022–0.029) | 0.716 (0.697–0.733) | 0.725 (0.724–0.726) |
| Fusion | 0.299 | 0.794 (0.785–0.803) | 0.025 (0.022–0.029) | 0.695 (0.676–0.713) | 0.746 (0.745–0.747) |
| Level 2 (t2+t3) | | | | | |
| LR | 0.515 | 0.785 (0.776–0.794) | 0.018 (0.016–0.021) | 0.704 (0.686–0.722) | 0.725 (0.724–0.726) |
| XGBoost | 0.51 | 0.793 (0.784–0.801) | 0.021 (0.019–0.024) | 0.700 (0.682–0.718) | 0.740 (0.739–0.741) |
| MLP | 0.211 | 0.803 (0.794–0.812) | 0.028 (0.024–0.033) | 0.723 (0.705–0.74) | 0.733 (0.732–0.734) |
| Fusion | 0.296 | 0.808 (0.799–0.817) | 0.029 (0.025–0.033) | 0.716 (0.697–0.735) | 0.745 (0.744–0.746) |
| Level 3 (t1+t2+t3) | | | | | |
| LR | 0.509 | 0.793 (0.784–0.803) | 0.022 (0.019–0.024) | 0.721 (0.704–0.739) | 0.727 (0.726–0.728) |
| XGBoost | 0.004 | 0.797 (0.788–0.806) | 0.025 (0.022–0.029) | 0.701 (0.684–0.719) | 0.753 (0.752**–**0.754) |
| MLP | 0.209 | 0.803 (0.793–0.811) | 0.028 (0.024–0.032) | 0.727 (0.71–0.744) | 0.731 (0.73–0.732) |
| Fusion | 0.209 | 0.810 (0.802–0.818) | 0.029 (0.026–0.034) | 0.736 (0.72–0.753) | 0.732 (0.731–0.733) |
| Level 4 (t2) | | | | | |
| LR | 0.499 | 0.761 (0.751–0.769) | 0.012 (0.011–0.014) | 0.722 (0.704–0.738) | 0.672 (0.67–0.673) |
| XGBoost | 0.004 | 0.765 (0.755–0.775) | 0.015 (0.013–0.018) | 0.679 (0.661–0.698) | 0.723 (0.722–0.724) |
| MLP | 0.296 | 0.792 (0.784–0.802) | 0.025 (0.022–0.029) | 0.716 (0.698–0.734) | 0.728 (0.728–0.73) |
| Fusion | 0.21 | 0.792 (0.783–0.8) | 0.026 (0.022–0.03) | 0.710 (0.694–0.729) | 0.727 (0.726–0.728) |
| Level 5 (t1) | | | | | |
| LR | 0.516 | 0.758 (0.75–0.767) | 0.012 (0.011–0.014) | 0.702 (0.683–0.719) | 0.692 (0.691–0.693) |
| XGBoost | 0.515 | 0.767 (0.758–0.776) | 0.016 (0.013–0.019) | 0.694 (0.676–0.711) | 0.713 (0.712–0.714) |
| MLP | 0.293 | 0.785 (0.776–0.794) | 0.025 (0.021–0.03) | 0.749 (0.732–0.766) | 0.682 (0.681–0.683) |
| Fusion | 0.293 | 0.784 (0.775–0.793) | 0.024 (0.021–0.028) | 0.749 (0.732–0.766) | 0.677 (0.676–0.678) |
| Level 6 (t1+t2) | | | | | |
| LR | 0.509 | 0.776 (0.768–0.785) | 0.016 (0.014–0.019) | 0.719 (0.701–0.738) | 0.702 (0.701–0.703) |
| XGBoost | 0.004 | 0.782 (0.772–0.792) | 0.020 (0.017–0.023) | 0.702 (0.682–0.719) | 0.730 (0.729–0.731) |
| MLP | 0.295 | 0.797 (0.788–0.806) | 0.027 (0.023–0.031) | 0.725 (0.708–0.743) | 0.728 (0.727–0.729) |
| Fusion | 0.292 | 0.800 (0.79–0.809) | 0.028 (0.024–0.032) | 0.743 (0.724–0.761) | 0.708 (0.707–0.709) |

**Table S7.** Hazard ratios of the risk of liver cancer

| Variables | Events | Person-years | Unadjusted  aHR (95% CI) | Collinearity-based  Adjusted aHR (95% CI) | Fully-adjusted  aHR (95% CI) |
| --- | --- | --- | --- | --- | --- |
| Age, y |  |  |  |  |  |
| <60 | 3,483 | 7,600,536 | 1.00 (Reference) | 1.00 (Reference) | 1.00 (Reference) |
| ≥60 | 8,918 | 12,078,649 | 1.61 (1.55–1.68) | 1.61 (1.54–1.67) | 1.52 (1.46–1.59) |
| Sex |  |  |  |  |  |
| Men | 9,355 | 8,828,336 | 1.00 (Reference) | 1.00 (Reference) | 1.00 (Reference) |
| Women | 3,046 | 10,850,849 | 0.27 (0.25–2.28) | 0.29 (0.28–0.31) | 0.45 (0.42–0.48) |
| Income |  |  |  |  |  |
| 1st period |  |  |  |  |  |
| 1st | 3,127 | 5,705,715 | 1.00 (Reference) | 1.00 (Reference) | 1.00 (Reference) |
| 2nd | 4,090 | 6,090,906 | 1.23 (1.17–1.28) | 1.19 (1.14–1.25) | 1.20 (1.14–1.26) |
| 3rd | 3,155 | 4,719,745 | 1.22 (1.16–1.28) | 1.23 (1.17–1.29) | 1.24 (1.18–1.31) |
| 4th | 2,029 | 3,162,818 | 1.17 (1.11–1.24) | 1.25 (1.18–1.32) | 1.27 (1.20–1.35) |
| 2nd period |  |  |  |  |  |
| 1st | 3,126 | 5,667,689 | 1.00 (Reference) | 1.00 (Reference) | 1.00 (Reference) |
| 2nd | 4,111 | 6,039,256 | 1.23 (1.18–1.29) | 1.20 (1.14–1.26) | 1.20 (1.15–1.26) |
| 3rd | 3,147 | 4,683,358 | 1.22 (1.16–1.28) | 1.23 (1.17–1.30) | 1.25 (1.18–1.31) |
| 4th | 2,017 | 3,288,882 | 1.11 (1.05–1.18) | 1.18 (1.12–1.25) | 1.21 (1.14–1.28) |
| 3rd period |  |  |  |  |  |
| 1st | 3,167 | 5,609,007 | 1.00 (Reference) | 1.00 (Reference) | 1.00 (Reference) |
| 2nd | 4,104 | 6,084,232 | 1.20 (1.14–1.25) | 1.17 (1.11–1.22) | 1.17 (1.12–1.23) |
| 3rd | 3,110 | 4,667,576 | 1.18 (1.12–1.24) | 1.19 (1.13–1.25) | 1.21 (1.15–1.27) |
| 4th | 2,020 | 3,318,371 | 1.08 (1.02–1.14) | 1.16 (1.10–1.23) | 1.18 (1.12–1.25) |
| Alcohol consumption |  |  |  |  |  |
| 1st period |  |  |  |  |  |
| Non-drinker | 6,086 | 12,264,395 | 1.00 (Reference) | 1.00 (Reference) | 1.00 (Reference) |
| Light drinker | 1,681 | 2,901,906 | 1.17 (1.11–1.23) | 0.87 (0.82–0.91) | 0.89 (0.84–0.94) |
| Light-to-moderate | 1,175 | 1,541,499 | 1.54 (1.44–1.64) | 0.89 (0.83–0.94) | 0.92 (0.86–0.98) |
| Moderate-to-heavy | 1,710 | 1,734,040 | 1.99 (1.88–2.10) | 1.04 (0.98–1.10) | 1.08 (1.02–1.14) |
| Heavy | 1,749 | 1,237,346 | 2.85 (2.70–3.01) | 1.35 (1.27–1.43) | 1.37 (1.29–1.45) |
| 2nd period |  |  |  |  |  |
| Non-drinker | 6,288 | 12,457,627 | 1.00 (Reference) | 1.00 (Reference) | 1.00 (Reference) |
| Light drinker | 1,715 | 2,938,563 | 1.16 (1.10–1.22) | 0.85 (0.80–0.90) | 0.87 (0.83–0.92) |
| Light-to-moderate | 1,179 | 1,501,231 | 1.56 (1.46–1.66) | 0.89 (0.83–0.95) | 0.92 (0.86–0.99) |
| Moderate-to-heavy | 1,618 | 1,651,153 | 1.94 (1.84–2.05) | 1.01 (0.96–1.08) | 1.05 (0.99–1.12) |
| Heavy | 1,601 | 1,130,612 | 2.81 (2.66–2.97) | 1.33 (1.25–1.41) | 1.35 (1.28–1.44) |
| 3rd period |  |  |  |  |  |
| Non-drinker | 6,515 | 12,654,014 | 1.00 (Reference) | 1.00 (Reference) | 1.00 (Reference) |
| Light drinker | 1,698 | 2,914,493 | 1.13 (1.07–1.19) | 0.82 (0.78–0.87) | 0.85 (0.80–0.89) |
| Light-to-moderate | 1,176 | 1,465,513 | 1.56 (1.47–1.66) | 0.89 (0.83–0.95) | 0.92 (0.86–0.98) |
| Moderate-to-heavy | 1,499 | 1,586,523 | 1.84 (1.74–1.94) | 0.96 (0.90–1.02) | 1.00 (0.94–1.06) |
| Heavy | 1,513 | 1,058,642 | 2.78 (2.63–2.94) | 1.32 (1.24–1.40) | 1.34 (1.26–1.42) |
| Smoking |  |  |  |  |  |
| 1st period |  |  |  |  |  |
| Never smoker | 5,582 | 13,360,633 | 1.00 (Reference) | 1.00 (Reference) | 1.00 (Reference) |
| Ex-smoker | 3,048 | 3,280,046 | 2.22 (2.13–2.33) | 1.04 (0.99–1.10) | 1.06 (1.01–1.12) |
| Current smoker | 3,771 | 3,038,506 | 2.97 (2.85–3.10) | 1.45 (1.38–1.52) | 1.49 (1.41–1.56) |
| 2nd period |  |  |  |  |  |
| Never smoker | 5,634 | 13,421,191 | 1.00 (Reference) | 1.00 (Reference) | 1.00 (Reference) |
| Ex-smoker | 3,176 | 3,452,810 | 2.19 (2.10–2.29) | 1.03 (0.98–1.08) | 1.05 (1.00–1.10) |
| Current smoker | 3,591 | 2,805,184 | 3.05 (2.93–3.18) | 1.49 (1.42–1.57) | 1.53 (1.45–1.60) |
| 3rd period |  |  |  |  |  |
| Never smoker | 5,764 | 13,509,309 | 1.00 (Reference) | 1.00 (Reference) | 1.00 (Reference) |
| Ex-smoker | 3,493 | 3,690,963 | 2.22 (2.13–2.31) | 1.04 (0.99–1.10) | 1.06 (1.01–1.11) |
| Current smoker | 3,144 | 2,478,914 | 2.97 (2.85–3.11) | 1.45 (1.38–1.53) | 1.47 (1.40–1.55) |
| Physical activity |  |  |  |  |  |
| 1st period |  |  |  |  |  |
| 0 | 6,120 | 9,550,910 | 1.00 (Reference) | 1.00 (Reference) | 1.00 (Reference) |
| 1–2 | 2,683 | 4,377,160 | 0.96 (0.91–1.00) | 0.92 (0.87–0.96) | 0.92 (0.88–0.97) |
| 3–4 | 2,496 | 4,043,941 | 0.96 (0.92–1.01) | 0.89 (0.85–0.93) | 0.89 (0.85–0.93) |
| 5–7 | 1,102 | 1,707,175 | 1.01 (0.95–1.07) | 0.87 (0.82–0.93) | 0.87 (0.81–0.93) |
| 2nd period |  |  |  |  |  |
| 0 | 6,151 | 9,267,080 | 1.00 (Reference) | 1.00 (Reference) | 1.00 (Reference) |
| 1–2 | 2,503 | 4,306,325 | 0.88 (0.84–0.92) | 0.85 (0.81–0.89) | 0.87 (0.83–0.91) |
| 3–4 | 2,535 | 4,260,074 | 0.90 (0.86–0.94) | 0.84 (0.80–0.88) | 0.85 (0.81–0.89) |
| 5–7 | 1,212 | 1,845,706 | 0.99 (0.93–1.05) | 0.88 (0.82–0.93) | 0.88 (0.83–0.93) |
| 3rd period |  |  |  |  |  |
| 0 | 6,082 | 9,060,456 | 1.00 (Reference) | 1.00 (Reference) | 1.00 (Reference) |
| 1–2 | 2,456 | 4,221,090 | 0.87 (0.83–0.91) | 0.85 (0.81–0.89) | 0.87 (0.83–0.91) |
| 3–4 | 2,630 | 4,440,649 | 0.88 (0.84–0.92) | 0.84 (0.80–0.88) | 0.85 (0.91–0.89) |
| 5–7 | 1,233 | 1,956,990 | 0.94 (0.88–1.00) | 0.83 (0.78–0.88) | 0.83 (0.78–0.89) |
| BMI, kg/m2 |  |  |  |  |  |
| 1st period |  |  |  |  |  |
| <24 | 5,372 | 9,749,818 | 1.00 (Reference) | 1.00 (Reference) | 1.00 (Reference) |
| ≥24 | 7,029 | 9,929,367 | 1.29 (1.24–1.33) | 1.14 (1.09–1.18) | 1.02 (0.98–1.06) |
| 2nd period |  |  |  |  |  |
| <24 | 5,477 | 9,804,136 | 1.00 (Reference) | 1.00 (Reference) | 1.00 (Reference) |
| ≥24 | 6,924 | 9,875,050 | 1.26 (1.21–1.30) | 1.13 (1.08–1.17) | 1.02 (0.98–1.06) |
| 3rd period |  |  |  |  |  |
| <24 | 5,450 | 9,665,474 | 1.00 (Reference) | 1.00 (Reference) | 1.00 (Reference) |
| ≥24 | 6,951 | 10,013,711 | 1.23 (1.19–1.28) | 1.13 (1.08–1.17) | 1.02 (0.98–1.06) |
| Hemoglobin |  |  |  |  |  |
| 1st period |  |  |  |  |  |
| <13 | 2,115 | 5,662,923 | 1.00 (Reference) | 1.00 (Reference) | 1.00 (Reference) |
| 13–17 | 9,991 | 13,767,867 | 1.94 (1.85–2.04) | 0.93 (0.88–0.98) | 1.01 (0.96–1.07) |
| ≥17 | 295 | 248,395 | 3.18 (2.82–3.59) | 0.98 (0.87–1.12) | 1.12 (0.98–1.27) |
| 2nd period |  |  |  |  |  |
| <13 | 2,060 | 5,290,183 | 1.00 (Reference) | 1.00 (Reference) | 1.00 (Reference) |
| 13–17 | 10,019 | 14,115,184 | 1.82 (1.74–1.91) | 0.94 (0.89–0.99) | 1.03 (0.97–1.08) |
| ≥17 | 322 | 273,818 | 3.02 (2.69–3.40) | 1.01 (0.89–1.14) | 1.17 (1.03–1.32) |
| 3rd period |  |  |  |  |  |
| <13 | 2,275 | 5,023,342 | 1.00 (Reference) | 1.00 (Reference) | 1.00 (Reference) |
| 13–17 | 9,798 | 14,346,224 | 1.51 (1.44–1.58) | 0.83 (0.79–0.87) | 0.91 (0.86–0.95) |
| ≥17 | 328 | 309,619 | 2.34 (2.08–2.63) | 0.84 (0.74–0.94) | 0.97 (0.86–1.09) |
| Fasting serum glucose levels | | | | | |
| 1st period |  |  |  |  |  |
| <100 | 6,368 | 12,401,301 | 1.00 (Reference) | 1.00 (Reference) | 1.00 (Reference) |
| 100–126 | 3,959 | 5,647,287 | 1.37 (1.31–1.42) | 1.12 (1.07–1.16) | 1.07 (1.02–1.11) |
| ≤126 | 2,074 | 1,630,597 | 2.48 (2.36–2.60) | 1.75 (1.67–1.85) | 1.24 (1.16–1.32) |
| 2nd period |  |  |  |  |  |
| <100 | 5,917 | 11,922,882 | 1.00 (Reference) | 1.00 (Reference) | 1.00 (Reference) |
| 100–126 | 4,198 | 5,995,981 | 1.41 (1.36–1.47) | 1.17 (1.12–1.21) | 1.13 (1.08–1.18) |
| ≤126 | 2,286 | 1,760,322 | 2.62 (2.49–2.75) | 1.88 (1.78–1.97) | 1.42 (1.34–1.51) |
| 3rd period |  |  |  |  |  |
| <100 | 5,373 | 11,178,391 | 1.00 (Reference) | 1.00 (Reference) | 1.00 (Reference) |
| 100–126 | 4,420 | 6,487,690 | 1.42 (1.36–1.48) | 1.19 (1.14–1.23) | 1.16 (1.12–1.21) |
| ≤126 | 2,608 | 2,013,104 | 2.70 (2.57–2.83) | 1.96 (1.87–2.06) | 1.56 (1.47–1.66) |
| Total cholesterol |  |  |  |  |  |
| 1st period |  |  |  |  |  |
| <180 | 6,057 | 55,282,219 | 1.00 (Reference) | 1.00 (Reference) | 1.00 (Reference) |
| 180–240 | 5,533 | 11,197,335 | 0.45 (0.44–0.47) | 0.54 (0.52–0.56) | 0.54 (0.52–0.56) |
| ≥240 | 811 | 2,953,631 | 0.25 (0.23–0.27) | 0.33 (0.31–0.36) | 0.35 (0.33–0.38) |
| 2nd period |  |  |  |  |  |
| <180 | 6,559 | 5,829,938 | 1.00 (Reference) | 1.00 (Reference) | 1.00 (Reference) |
| 180–240 | 5,133 | 10,981,950 | 0.42 (0.40–0.43) | 0.51 (0.49–0.53) | 0.51 (0.49–0.53) |
| ≥240 | 709 | 2,867,298 | 0.22 (0.20–0.24) | 0.32 (0.29–0.34) | 0.33 (0.30–0.35) |
| 3rd period |  |  |  |  |  |
| <180 | 7,114 | 6,389,494 | 1.00 (Reference) | 1.00 (Reference) | 1.00 (Reference) |
| 180–240 | 4,683 | 10,570,805 | 0.40 (0.38–0.41) | 0.50 (0.48–0.52) | 0.50 (0.48–0.52) |
| ≥240 | 604 | 2,718,886 | 0.20 (0.18–0.22) | 0.30 (0.28–0.33) | 0.31 (0.28–0.33) |
| HDL cholesterol |  |  |  |  |  |
| 1st period |  |  |  |  |  |
| <35 | 836 | 725,223 | 1.00 (Reference) | 1.00 (Reference) | 1.00 (Reference) |
| 35–60 | 8,052 | 12,534,565 | 0.56 (0.52–0.60) | 0.72 (0.67–0.78) | 0.92 (0.85–0.99) |
| ≥60 | 3,513 | 6,419,397 | 0.48 (0.44–0.51) | 0.77 (0.71–0.83) | 1.20 (1.11–1.30) |
| 2nd period |  |  |  |  |  |
| <35 | 856 | 742,411 | 1.00 (Reference) | 1.00 (Reference) | 1.00 (Reference) |
| 35–60 | 8,081 | 12,631,139 | 0.56 (0.52–0.60) | 0.75 (0.70–0.80) | 0.97 (0.90–1.04) |
| ≥60 | 3,464 | 6,305,635 | 0.48 (0.44–0.51) | 0.81 (0.75–0.88) | 1.29 (1.19–1.40) |
| 3rd period |  |  |  |  |  |
| <35 | 1,038 | 780,893 | 1.00 (Reference) | 1.00 (Reference) | 1.00 (Reference) |
| 35–60 | 8,005 | 12,578,667 | 0.48 (0.45–0.51) | 0.66 (0.62–0.70) | 0.85 (0.79–0.91) |
| ≥60 | 3,358 | 6,319,626 | 0.40 (0.37–0.43) | 0.70 (0.65–0.75) | 1.11 (1.03–1.19) |
| Waist circumference | | | | | |
| 1st period |  |  |  |  |  |
| <80 | 3,256 | 8,045,806 | 1.00 (Reference) | 1.00 (Reference) | 1.00 (Reference) |
| ≥80 | 9,145 | 11,633,379 | 1.94 (1.87–2.02) | 1.12 (1.07–1.17) | 1.16 (1.11–1.21) |
| 2nd period |  |  |  |  |  |
| <80 | 3,249 | 7,961,515 | 1.00 (Reference) | 1.00 (Reference) | 1.00 (Reference) |
| ≥80 | 9,152 | 11,717,670 | 1.91 (1.84–1.99) | 1.14 (1.09–1.19) | 1.19 (1.14–1.24) |
| 3rd period |  |  |  |  |  |
| <80 | 3,093 | 7,614,348 | 1.00 (Reference) | 1.00 (Reference) | 1.00 (Reference) |
| ≥80 | 9,308 | 12,064,837 | 1.90 (1.82–1.98) | 1.16 (1.11–1.21) | 1.22 (1.16–1.27) |
| History of stroke |  |  |  |  |  |
| No | 12,064 | 19,220,395 | 1.00 (Reference) | 1.00 (Reference) | 1.00 (Reference) |
| Yes | 337 | 458,790 | 1.17 (1.05–1.30) | 0.91 (0.82–1.02) | 0.82 (0.74–0.92) |
| History of heart disease | | | | | |
| No | 11,652 | 18,595,606 | 1.00 (Reference) | 1.00 (Reference) | 1.00 (Reference) |
| Yes | 749 | 1,083,579 | 1.10 (1.03–1.19) | 0.86 (0.80–0.92) | 0.66 (0.61–0.71) |
| History of hypertension | | | | | |
| No | 6,770 | 12,500,026 | 1.00 (Reference) | 1.00 (Reference) | 1.00 (Reference) |
| Yes | 5,631 | 7,179,159 | 1.45 (1.40–1.50) | 1.14 (1.10–1.19) | 1.17 (1.11–1.24) |
| History of diabetes | | | | | |
| No | 9,155 | 17,045,271 | 1.00 (Reference) | 1.00 (Reference) | 1.00 (Reference) |
| Yes | 3,246 | 2,633,915 | 2.30 (2.21–2.39) | 1.83 (1.76–1.91) | 1.83 (1.76–1.91) |
| History of dyslipidemia | | | | | |
| No | 11,182 | 16,611,757 | 1.00 (Reference) | 1.00 (Reference) | 1.00 (Reference) |
| Yes | 1,219 | 3,067,428 | 0.59 (0.56–0.63) | 0.61 (0.58–0.65) | 0.60 (0.56–0.64) |
| History of HCV |  |  |  |  |  |
| No | 12,179 | 19,645,196 | 1.00 (Reference) | 1.00 (Reference) | 1.00 (Reference) |
| Yes | 222 | 33,989 | 10.54 (9.23–12.03) | 5.69 (4.96–6.52) | 5.11 (4.47–5.86) |
| History of HBV |  |  |  |  |  |
| No | 11,298 | 19,532,881 | 1.00 (Reference) | 1.00 (Reference) | 1.00 (Reference) |
| Yes | 1,103 | 146,305 | 13.04 (12.26–13.87) | 11.88 (11.10–12.71) | 9.84 (9.20–10.53) |
| History of ALD |  |  |  |  |  |
| No | 12,052 | 19,600,399 | 1.00 (Reference) | 1.00 (Reference) | 1.00 (Reference) |
| Yes | 349 | 78,786 | 7.21 (6.48–8.02) | 2.20 (1.94–2.48) | 2.21 (1.95–2.50) |
| History of MASLD | | | | | |
| No | 10,863 | 17,815,922 | 1.00 (Reference) | 1.00 (Reference) | 1.00 (Reference) |
| Yes | 1,538 | 1,863,263 | 1.36 (1.28–1.43) | 0.95 (0.90–1.01) | 0.92 (0.87–0.98) |
| History of cryptogenic liver disease | | | | | |
| No | 12,378 | 19,674,057 | 1.00 (Reference) | 1.00 (Reference) | 1.00 (Reference) |
| Yes | 23 | 5,128 | 7.14 (4.75–10.75) | 4.10 (2.72–6.19) | 4.14 (2.72–6.24) |
| History of cirrhosis | | | | | |
| No | 12,255 | 19,673,029 | 1.00 (Reference) | 1.00 (Reference) | 1.00 (Reference) |
| Yes | 146 | 6,157 | 38.10 (32.36–44.85) | 12.56 (10.64–14.83) | 5.53 (4.58–6.66) |
| Family history of liver cancer | | | | | |
| No | 11,709 | 19,233,089 | 1.00 (Reference) | 1.00 (Reference) | 1.00 (Reference) |
| Yes | 692 | 446,096 | 2.55 (2.36–2.75) | 2.49 (2.30–2.69) | 2.39 (2.21–2.58) |
| Family history of non-liver cancers | | | | | |
| No | 10,981 | 17,243,194 | 1.00 (Reference) | 1.00 (Reference) | 1.00 (Reference) |
| Yes | 1,420 | 2,435,991 | 0.92 (0.87–0.97) | 0.92 (0.87–0.97) | 0.93 (0.87–0.98) |

Abbreviations: aHR, adjusted hazard ratio; CI, confidence interval; BMI, body mass index; HDL, high-density lipoprotein; HCV, hepatitis C virus; HBV, hepatitis B virus; ALD, alcohol-related liver disease; MASLD, metabolic dysfunction–associated steatotic liver disease


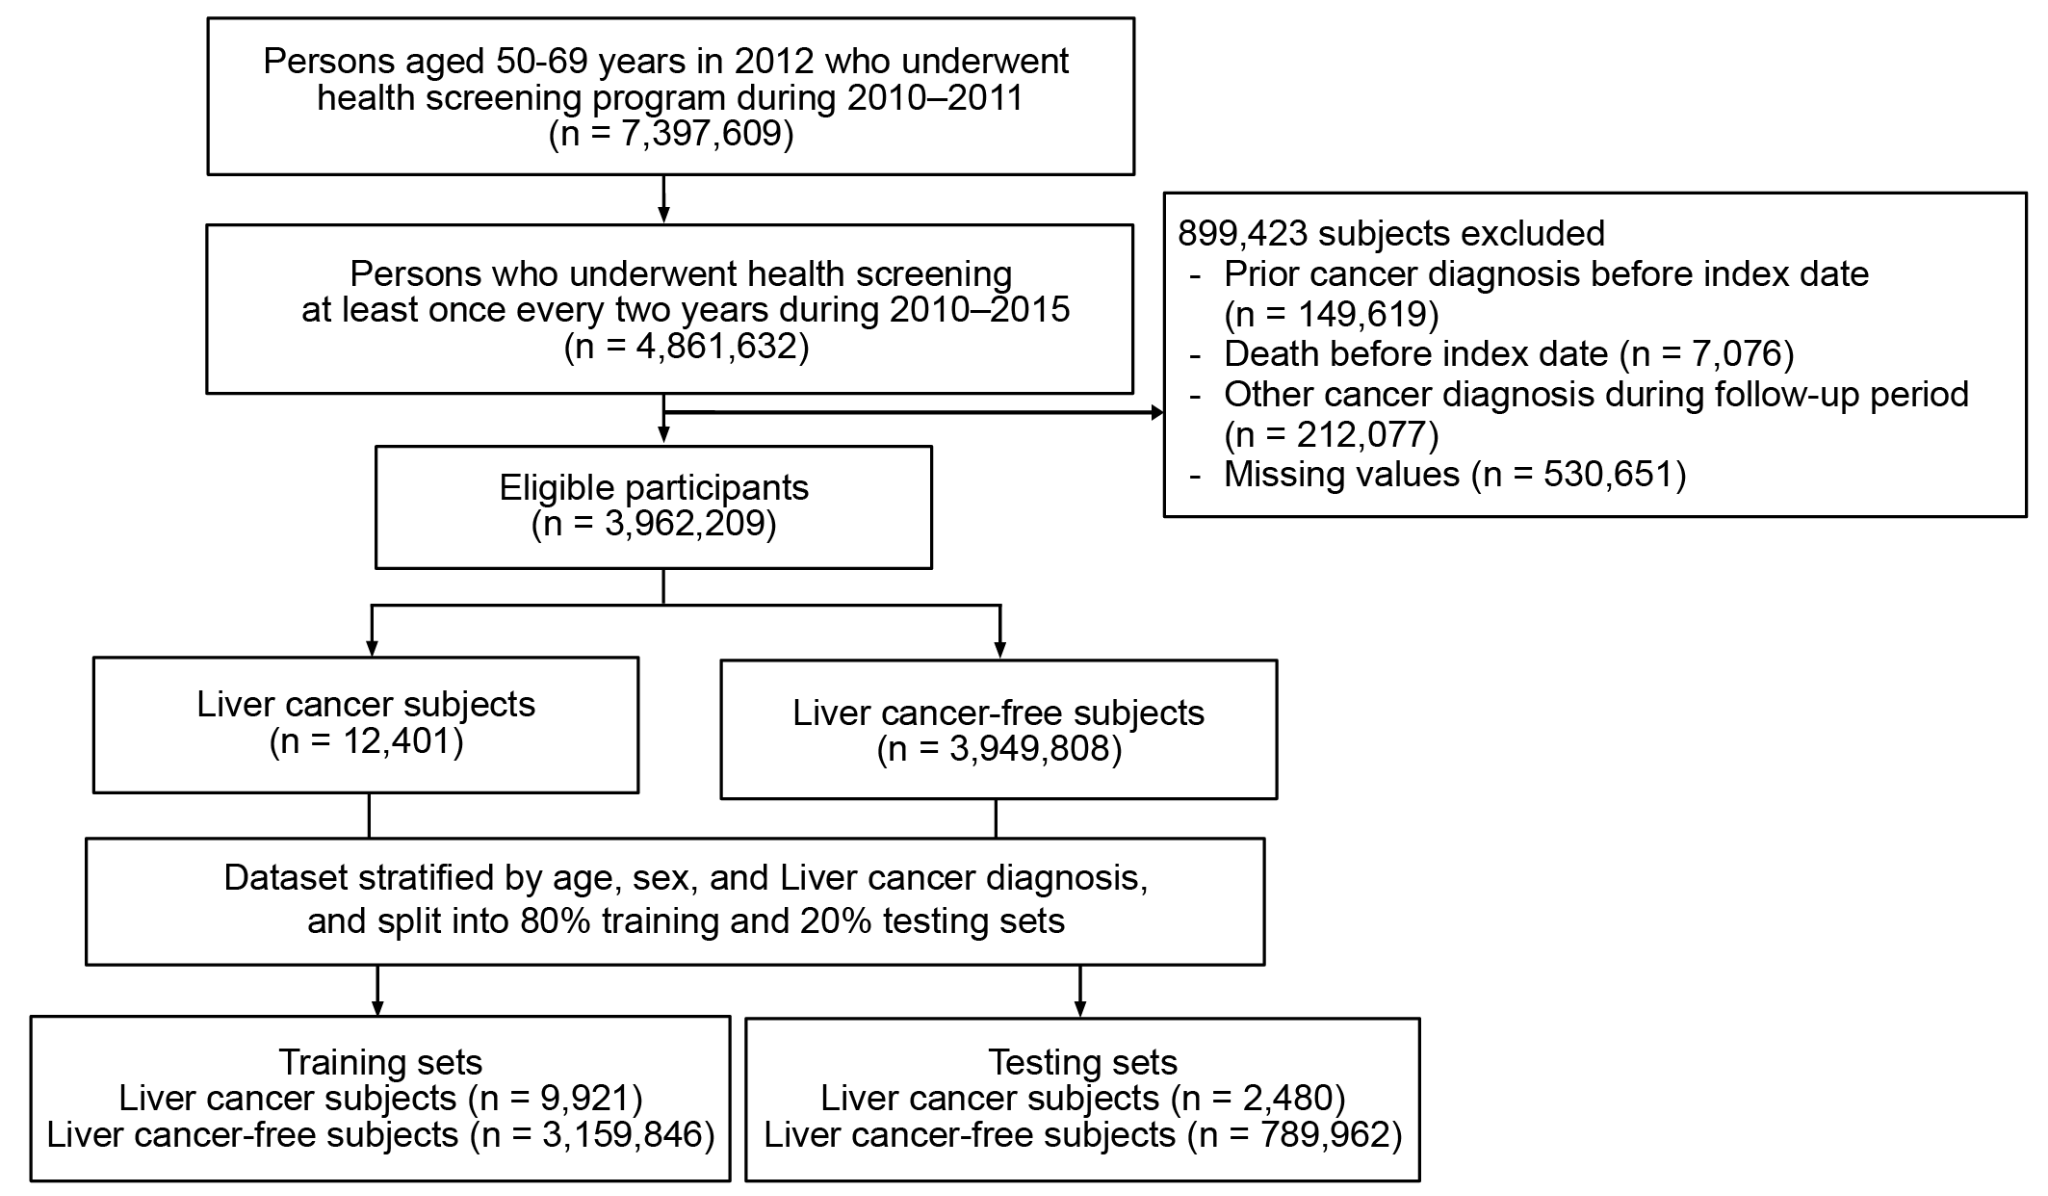


**Figure S1.** Flowchart of cohort selection

**Methods S1.** Data preprocessing

Data preprocessing included normalization of continuous variables and encoding of categorical variables using StandardScaler and LabelEncoder, respectively. Temporal continuous variables—including body mass index, hemoglobin, fasting serum glucose, waist circumference, total cholesterol, and high-density lipoprotein—were standardized separately for each variable at each time point. The static continuous variable age was scaled using a single global scaler. Normalization was applied using the following formula:
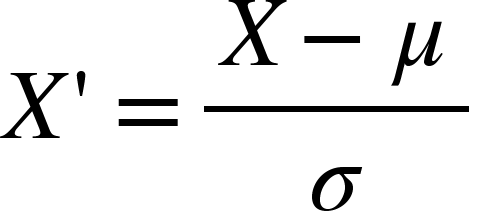


where
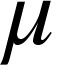
 represents the mean and
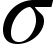
 the standard deviation computed from the training set.

Temporal ordinal variables—including alcohol consumption, physical activity, smoking frequency, and income level—were encoded using LabelEncoder, with separate encoders fitted for each variable at each time point. Static binary variables—including sex and medical history indicators such as hypertension, diabetes, stroke, heart disease, dyslipidemia, and various liver diseases (hepatitis B, hepatitis C, alcohol-related liver disease, metabolic dysfunction–associated steatotic liver disease, cryptogenic liver disease, and cirrhosis)—were also label encoded.

**Methods S2.** Fusion model development details

To classify liver cancer using both static and temporal clinical features, we developed a fusion model comprising three modules: a static encoder, a temporal encoder, and a fusion-based classifier. The model was trained on a single NVIDIA Tesla V100 GPU (32 GB VRAM), with hyperparameters optimized through a group-wise search strategy.

The static encoder processed baseline variables using an MLP with configurable depth and hidden dimensions. When depth was specified as an integer, the network applied progressive dimensionality reduction by halving the number of hidden units at each layer. Optional components included batch normalization and dropout, with ReLU or SiLU as activation functions. An optional final activation could be applied depending on the task.

Temporal variables were structured as a 3D tensor:

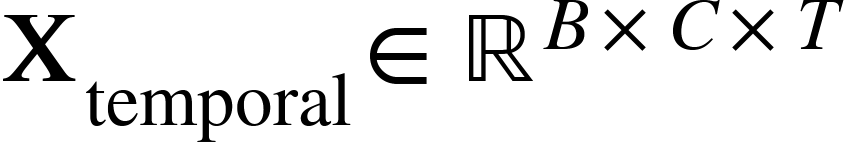


where ***B*** is the batch size, ***C*** is the number of temporal variables, and ***T*** is the number of time points. These features were processed through 1D convolutional layers with configurable depth and number of channels. Each convolutional block could include residual connections, batch normalization, dropout, and nonlinear activation. Temporal embeddings were aggregated through global average pooling after the final convolution.

Outputs from the static and temporal encoders were concatenated:

The concatenated vector was passed to a fully connected classifier with optional batch normalization, dropout, and nonlinearities, producing the final prediction through sigmoid activation.

To address class imbalance, we implemented an asymmetric loss function combining binary cross-entropy with class-specific focusing terms and a confidence margin:


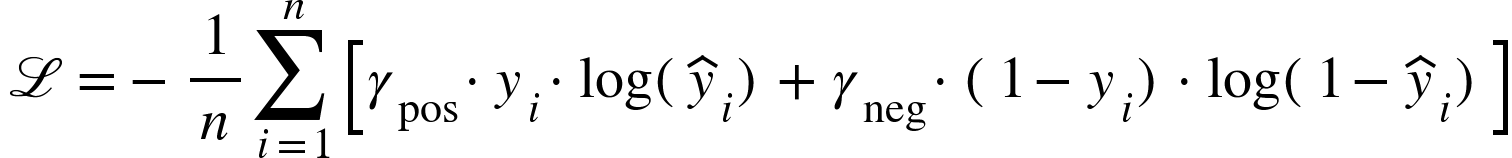


Here,
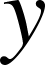
 denotes the ground-truth label and *ŷ* denotes the predicted probability. The margin penalized confident false positives by shifting predicted probabilities for negative samples. Class-specific focusing parameters and were applied to modulate the contributions of positive and negative samples, respectively, assigning higher penalties to misclassified minority instances. Models were trained for up to 100 epochs, with early stopping based on validation loss. Candidate hyperparameters included learning rate (e.g., 1e−3, 5e−4), batch size (256 or 512), optimizer (Adam or AdamW), dropout (0.0–0.5), and activation functions (ReLU or SiLU).
